# Supplementary material for: Deep learning models for the estimation of free energy of permeation of small molecules across lipid membranes
Source: Royal Society of Chemistry journal article supplement (doi:10.1039/d2dd00119e), 2022-12-21
Supplement: d2dd00119e2.zip [file d2dd00119e2.zip]

## Sheet: Sheet1
Molecule	Lipid	Permeation FE (kcal/mol)
C1-C1	DPPC	-7.8
C1-C2	DPPC	-7.1
C1-C3	DPPC	-6.5
C1-C4	DPPC	-5.7
C1-C5	DPPC	-4.8
C1-N0	DPPC	-3.2
C1-Na	DPPC	-1.9
C1-Nd	DPPC	-2.2
C1-Nda	DPPC	-2.1
C1-P1	DPPC	-0.9
C1-P2	DPPC	-0.2
C1-P3	DPPC	1
C1-P4	DPPC	2
C1-P5	DPPC	3
C2-C2	DPPC	-6.6
C2-C3	DPPC	-6.1
C2-C4	DPPC	-4.9
C2-C5	DPPC	-4.4
C2-N0	DPPC	-2.4
C2-Na	DPPC	-1.6
C2-Nd	DPPC	-1.5
C2-Nda	DPPC	-1.3
C2-P1	DPPC	0
C2-P2	DPPC	0.6
C2-P3	DPPC	1.6
C2-P4	DPPC	2.9
C2-P5	DPPC	3.9
C3-C3	DPPC	-5.2
C3-C4	DPPC	-4
C3-C5	DPPC	-3.4
C3-N0	DPPC	-1.5
C3-Na	DPPC	-0.9
C3-Nd	DPPC	-0.7
C3-Nda	DPPC	-0.5
C3-P1	DPPC	0.8
C3-P2	DPPC	1.6
C3-P3	DPPC	2.6
C3-P4	DPPC	3.7
C3-P5	DPPC	4.6
C4-C4	DPPC	-2.9
C4-C5	DPPC	-2.7
C4-N0	DPPC	-0.9
C4-Na	DPPC	0.5
C4-Nd	DPPC	0.3
C4-Nda	DPPC	0.4
C4-P1	DPPC	1.6
C4-P2	DPPC	2.1
C4-P3	DPPC	3.6
C4-P4	DPPC	4
C4-P5	DPPC	5.6
C5-C5	DPPC	-1.4
C5-N0	DPPC	0.3
C5-Na	DPPC	1
C5-Nd	DPPC	1.2
C5-Nda	DPPC	1.1
C5-P1	DPPC	2.5
C5-P2	DPPC	3.4
C5-P3	DPPC	4.4
C5-P4	DPPC	5.4
C5-P5	DPPC	6.1
N0-N0	DPPC	1.7
N0-Na	DPPC	3.4
N0-Nd	DPPC	3
N0-Nda	DPPC	3
N0-P1	DPPC	4.1
N0-P2	DPPC	5.2
N0-P3	DPPC	5.9
N0-P4	DPPC	7
N0-P5	DPPC	8.2
Na-Na	DPPC	4.2
Na-Nd	DPPC	4.2
Na-Nda	DPPC	4.2
Na-P1	DPPC	5
Na-P2	DPPC	6.1
Na-P3	DPPC	7.3
Na-P4	DPPC	7.9
Na-P5	DPPC	9.3
Nd-Nd	DPPC	4
Nd-Nda	DPPC	4.4
Nd-P1	DPPC	5.5
Nd-P2	DPPC	6.1
Nd-P3	DPPC	7
Nd-P4	DPPC	8
Nd-P5	DPPC	9.3
Nda-Nda	DPPC	4.2
Nda-P1	DPPC	5.4
Nda-P2	DPPC	5.9
Nda-P3	DPPC	7.3
Nda-P4	DPPC	8.5
Nda-P5	DPPC	9.4
P1-P1	DPPC	6.1
P1-P2	DPPC	7.1
P1-P3	DPPC	8.6
P1-P4	DPPC	9.1
P1-P5	DPPC	10.4
P2-P2	DPPC	8.1
P2-P3	DPPC	9
P2-P4	DPPC	10.4
P2-P5	DPPC	11.3
P3-P3	DPPC	10.4
P3-P4	DPPC	11.3
P3-P5	DPPC	12.6
P4-P4	DPPC	12.5
P4-P5	DPPC	13.4
P5-P5	DPPC	14.7
C1-C1	DOPC	-8.1
C1-C2	DOPC	-7.5
C1-C3	DOPC	-6.6
C1-C4	DOPC	-5.8
C1-C5	DOPC	-5.2
C1-N0	DOPC	-3.5
C1-Na	DOPC	-2.4
C1-Nd	DOPC	-2.2
C1-Nda	DOPC	-2.2
C1-P1	DOPC	-1.2
C1-P2	DOPC	-0.5
C1-P3	DOPC	0.9
C1-P4	DOPC	1.9
C1-P5	DOPC	3
C2-C2	DOPC	-7.2
C2-C3	DOPC	-6.3
C2-C4	DOPC	-5.7
C2-C5	DOPC	-4.8
C2-N0	DOPC	-3
C2-Na	DOPC	-1.3
C2-Nd	DOPC	-1.9
C2-Nda	DOPC	-1.9
C2-P1	DOPC	-0.8
C2-P2	DOPC	0.1
C2-P3	DOPC	1.4
C2-P4	DOPC	2.2
C2-P5	DOPC	3.6
C3-C3	DOPC	-5.5
C3-C4	DOPC	-4.7
C3-C5	DOPC	-3.9
C3-N0	DOPC	-1.9
C3-Na	DOPC	-0.8
C3-Nd	DOPC	-0.8
C3-Nda	DOPC	-0.5
C3-P1	DOPC	0.2
C3-P2	DOPC	1.1
C3-P3	DOPC	2.1
C3-P4	DOPC	3.4
C3-P5	DOPC	4.3
C4-C4	DOPC	-3.9
C4-C5	DOPC	-3
C4-N0	DOPC	-1
C4-Na	DOPC	-0.1
C4-Nd	DOPC	0.4
C4-Nda	DOPC	0.2
C4-P1	DOPC	1
C4-P2	DOPC	1.9
C4-P3	DOPC	2.7
C4-P4	DOPC	4.1
C4-P5	DOPC	4.9
C5-C5	DOPC	-2.2
C5-N0	DOPC	-0.5
C5-Na	DOPC	0.9
C5-Nd	DOPC	1.1
C5-Nda	DOPC	1
C5-P1	DOPC	2
C5-P2	DOPC	2.7
C5-P3	DOPC	4.1
C5-P4	DOPC	5.3
C5-P5	DOPC	6.2
N0-N0	DOPC	1.1
N0-Na	DOPC	2.8
N0-Nd	DOPC	2.7
N0-Nda	DOPC	2.8
N0-P1	DOPC	3.5
N0-P2	DOPC	4.4
N0-P3	DOPC	5.4
N0-P4	DOPC	6.6
N0-P5	DOPC	7.4
Na-Na	DOPC	3.9
Na-Nd	DOPC	3.9
Na-Nda	DOPC	3.8
Na-P1	DOPC	4.9
Na-P2	DOPC	5.6
Na-P3	DOPC	7.1
Na-P4	DOPC	7.9
Na-P5	DOPC	8.9
Nd-Nd	DOPC	4.3
Nd-Nda	DOPC	4
Nd-P1	DOPC	5.1
Nd-P2	DOPC	5.6
Nd-P3	DOPC	6.8
Nd-P4	DOPC	8.1
Nd-P5	DOPC	9.3
Nda-Nda	DOPC	4
Nda-P1	DOPC	5
Nda-P2	DOPC	6
Nda-P3	DOPC	6.9
Nda-P4	DOPC	8.1
Nda-P5	DOPC	9.3
P1-P1	DOPC	5.8
P1-P2	DOPC	6.8
P1-P3	DOPC	8
P1-P4	DOPC	8.7
P1-P5	DOPC	9.5
P2-P2	DOPC	7.3
P2-P3	DOPC	8.7
P2-P4	DOPC	9.6
P2-P5	DOPC	10.5
P3-P3	DOPC	10
P3-P4	DOPC	10.8
P3-P5	DOPC	12
P4-P4	DOPC	11.8
P4-P5	DOPC	13.3
P5-P5	DOPC	14
C1-C1	POPC	-8
C1-C2	POPC	-7.8
C1-C3	POPC	-6.9
C1-C4	POPC	-5.7
C1-C5	POPC	-5
C1-N0	POPC	-3.1
C1-Na	POPC	-2.4
C1-Nd	POPC	-2
C1-Nda	POPC	-2
C1-P1	POPC	-0.8
C1-P2	POPC	0
C1-P3	POPC	1
C1-P4	POPC	1.8
C1-P5	POPC	3.3
C2-C2	POPC	-6.7
C2-C3	POPC	-6
C2-C4	POPC	-5.1
C2-C5	POPC	-4.1
C2-N0	POPC	-2.7
C2-Na	POPC	-1.3
C2-Nd	POPC	-1.3
C2-Nda	POPC	-1.2
C2-P1	POPC	-0.4
C2-P2	POPC	0.3
C2-P3	POPC	1.6
C2-P4	POPC	2.5
C2-P5	POPC	3.5
C3-C3	POPC	-5.2
C3-C4	POPC	-4.2
C3-C5	POPC	-3.5
C3-N0	POPC	-1.9
C3-Na	POPC	-0.6
C3-Nd	POPC	-0.8
C3-Nda	POPC	-0.6
C3-P1	POPC	0
C3-P2	POPC	1.4
C3-P3	POPC	2.6
C3-P4	POPC	3.7
C3-P5	POPC	4.6
C4-C4	POPC	-3.3
C4-C5	POPC	-2.9
C4-N0	POPC	-1
C4-Na	POPC	0.3
C4-Nd	POPC	0.3
C4-Nda	POPC	0.6
C4-P1	POPC	1.3
C4-P2	POPC	2.6
C4-P3	POPC	3.1
C4-P4	POPC	4.4
C4-P5	POPC	5.2
C5-C5	POPC	-1.6
C5-N0	POPC	-0.1
C5-Na	POPC	1.1
C5-Nd	POPC	1.2
C5-Nda	POPC	1.5
C5-P1	POPC	1.9
C5-P2	POPC	2.9
C5-P3	POPC	4.4
C5-P4	POPC	5.1
C5-P5	POPC	6.4
N0-N0	POPC	1.8
N0-Na	POPC	2.8
N0-Nd	POPC	2.9
N0-Nda	POPC	2.7
N0-P1	POPC	3.9
N0-P2	POPC	4.5
N0-P3	POPC	5.7
N0-P4	POPC	7
N0-P5	POPC	7.8
Na-Na	POPC	4
Na-Nd	POPC	4.1
Na-Nda	POPC	4.4
Na-P1	POPC	5.1
Na-P2	POPC	6.1
Na-P3	POPC	7.1
Na-P4	POPC	8.1
Na-P5	POPC	9.2
Nd-Nd	POPC	4.1
Nd-Nda	POPC	4.1
Nd-P1	POPC	5.1
Nd-P2	POPC	6
Nd-P3	POPC	7
Nd-P4	POPC	8.3
Nd-P5	POPC	9.3
Nda-Nda	POPC	3.9
Nda-P1	POPC	5
Nda-P2	POPC	6.2
Nda-P3	POPC	7.3
Nda-P4	POPC	8.5
Nda-P5	POPC	9.6
P1-P1	POPC	5.6
P1-P2	POPC	6.8
P1-P3	POPC	8.4
P1-P4	POPC	9.1
P1-P5	POPC	10.4
P2-P2	POPC	8
P2-P3	POPC	9.4
P2-P4	POPC	10.5
P2-P5	POPC	11.2
P3-P3	POPC	10.3
P3-P4	POPC	11.2
P3-P5	POPC	12.4
P4-P4	POPC	12
P4-P5	POPC	13.2
P5-P5	POPC	14.5
C1-C1	DLPC	-8.1
C1-C2	DLPC	-7.7
C1-C3	DLPC	-6.7
C1-C4	DLPC	-5.6
C1-C5	DLPC	-5.4
C1-N0	DLPC	-3.1
C1-Na	DLPC	-2.2
C1-Nd	DLPC	-2.2
C1-Nda	DLPC	-1.7
C1-P1	DLPC	-0.7
C1-P2	DLPC	0
C1-P3	DLPC	1.5
C1-P4	DLPC	2.1
C1-P5	DLPC	3.2
C2-C2	DLPC	-6.9
C2-C3	DLPC	-6.2
C2-C4	DLPC	-5.4
C2-C5	DLPC	-4.4
C2-N0	DLPC	-2.2
C2-Na	DLPC	-1.3
C2-Nd	DLPC	-1.3
C2-Nda	DLPC	-1.1
C2-P1	DLPC	-0.3
C2-P2	DLPC	0.6
C2-P3	DLPC	1.8
C2-P4	DLPC	2.8
C2-P5	DLPC	3.8
C3-C3	DLPC	-5.2
C3-C4	DLPC	-4.1
C3-C5	DLPC	-3.7
C3-N0	DLPC	-1.6
C3-Na	DLPC	-0.7
C3-Nd	DLPC	-0.5
C3-Nda	DLPC	-0.5
C3-P1	DLPC	0.3
C3-P2	DLPC	1.3
C3-P3	DLPC	2.7
C3-P4	DLPC	3.5
C3-P5	DLPC	4.8
C4-C4	DLPC	-3.5
C4-C5	DLPC	-2.3
C4-N0	DLPC	-0.8
C4-Na	DLPC	0.5
C4-Nd	DLPC	0.3
C4-Nda	DLPC	0.4
C4-P1	DLPC	1.6
C4-P2	DLPC	2.3
C4-P3	DLPC	3.4
C4-P4	DLPC	4.7
C4-P5	DLPC	5.5
C5-C5	DLPC	-1.8
C5-N0	DLPC	0
C5-Na	DLPC	0.9
C5-Nd	DLPC	1.1
C5-Nda	DLPC	1
C5-P1	DLPC	2.5
C5-P2	DLPC	3.2
C5-P3	DLPC	4.3
C5-P4	DLPC	5.3
C5-P5	DLPC	6.6
N0-N0	DLPC	2.1
N0-Na	DLPC	3.2
N0-Nd	DLPC	3.4
N0-Nda	DLPC	3.1
N0-P1	DLPC	4.3
N0-P2	DLPC	5
N0-P3	DLPC	5.8
N0-P4	DLPC	7
N0-P5	DLPC	7.7
Na-Na	DLPC	4.1
Na-Nd	DLPC	4.1
Na-Nda	DLPC	4
Na-P1	DLPC	5.3
Na-P2	DLPC	6.2
Na-P3	DLPC	7.5
Na-P4	DLPC	8.1
Na-P5	DLPC	9.4
Nd-Nd	DLPC	4
Nd-Nda	DLPC	4.1
Nd-P1	DLPC	5.4
Nd-P2	DLPC	6.3
Nd-P3	DLPC	7.4
Nd-P4	DLPC	7.9
Nd-P5	DLPC	9.3
Nda-Nda	DLPC	3.8
Nda-P1	DLPC	5.4
Nda-P2	DLPC	6
Nda-P3	DLPC	7.2
Nda-P4	DLPC	8.5
Nda-P5	DLPC	9.3
P1-P1	DLPC	6.4
P1-P2	DLPC	7
P1-P3	DLPC	8.3
P1-P4	DLPC	9.3
P1-P5	DLPC	10.9
P2-P2	DLPC	8.1
P2-P3	DLPC	9.2
P2-P4	DLPC	10.1
P2-P5	DLPC	11.5
P3-P3	DLPC	10.6
P3-P4	DLPC	11.5
P3-P5	DLPC	12.5
P4-P4	DLPC	12.1
P4-P5	DLPC	13.6
P5-P5	DLPC	14.5
C1-C1	DAPC	-7.5
C1-C2	DAPC	-6.7
C1-C3	DAPC	-6.6
C1-C4	DAPC	-6.3
C1-C5	DAPC	-4.8
C1-N0	DAPC	-4
C1-Na	DAPC	-2.3
C1-Nd	DAPC	-2.5
C1-Nda	DAPC	-2.5
C1-P1	DAPC	-2.3
C1-P2	DAPC	-1.7
C1-P3	DAPC	0.2
C1-P4	DAPC	1.1
C1-P5	DAPC	2
C2-C2	DAPC	-6.1
C2-C3	DAPC	-6.1
C2-C4	DAPC	-5.6
C2-C5	DAPC	-4.6
C2-N0	DAPC	-3.4
C2-Na	DAPC	-1.9
C2-Nd	DAPC	-2.1
C2-Nda	DAPC	-2
C2-P1	DAPC	-1.5
C2-P2	DAPC	-1.2
C2-P3	DAPC	0.6
C2-P4	DAPC	2
C2-P5	DAPC	3.1
C3-C3	DAPC	-5.6
C3-C4	DAPC	-5.4
C3-C5	DAPC	-4.5
C3-N0	DAPC	-3.4
C3-Na	DAPC	-1.5
C3-Nd	DAPC	-1.7
C3-Nda	DAPC	-1.6
C3-P1	DAPC	-1.6
C3-P2	DAPC	-1.1
C3-P3	DAPC	0.6
C3-P4	DAPC	1.7
C3-P5	DAPC	3.2
C4-C4	DAPC	-5.2
C4-C5	DAPC	-4.5
C4-N0	DAPC	-3.1
C4-Na	DAPC	-1.4
C4-Nd	DAPC	-1.6
C4-Nda	DAPC	-1.4
C4-P1	DAPC	-1.3
C4-P2	DAPC	-0.1
C4-P3	DAPC	1.3
C4-P4	DAPC	2.4
C4-P5	DAPC	3
C5-C5	DAPC	-3.2
C5-N0	DAPC	-2.2
C5-Na	DAPC	-0.7
C5-Nd	DAPC	-0.7
C5-Nda	DAPC	-0.8
C5-P1	DAPC	-0.1
C5-P2	DAPC	0.1
C5-P3	DAPC	2
C5-P4	DAPC	3.1
C5-P5	DAPC	4.1
N0-N0	DAPC	-0.9
N0-Na	DAPC	0.5
N0-Nd	DAPC	0.3
N0-Nda	DAPC	0.5
N0-P1	DAPC	1.1
N0-P2	DAPC	1.4
N0-P3	DAPC	2.9
N0-P4	DAPC	4.5
N0-P5	DAPC	5.4
Na-Na	DAPC	2.4
Na-Nd	DAPC	2.3
Na-Nda	DAPC	2.5
Na-P1	DAPC	3.1
Na-P2	DAPC	3.1
Na-P3	DAPC	4.8
Na-P4	DAPC	5.8
Na-P5	DAPC	7.2
Nd-Nd	DAPC	2.2
Nd-Nda	DAPC	2.5
Nd-P1	DAPC	2.7
Nd-P2	DAPC	2.8
Nd-P3	DAPC	4.7
Nd-P4	DAPC	6.1
Nd-P5	DAPC	7.3
Nda-Nda	DAPC	2.4
Nda-P1	DAPC	2.6
Nda-P2	DAPC	3.1
Nda-P3	DAPC	5
Nda-P4	DAPC	6.4
Nda-P5	DAPC	7.2
P1-P1	DAPC	3.2
P1-P2	DAPC	3.5
P1-P3	DAPC	5.7
P1-P4	DAPC	6.4
P1-P5	DAPC	7.3
P2-P2	DAPC	3.9
P2-P3	DAPC	5.7
P2-P4	DAPC	6.6
P2-P5	DAPC	7.7
P3-P3	DAPC	7.6
P3-P4	DAPC	8.6
P3-P5	DAPC	10.1
P4-P4	DAPC	9.9
P4-P5	DAPC	10.7
P5-P5	DAPC	12.2
C1-C1	DIPC	-7.4
C1-C2	DIPC	-7.2
C1-C3	DIPC	-6.7
C1-C4	DIPC	-6.3
C1-C5	DIPC	-5.5
C1-N0	DIPC	-4.3
C1-Na	DIPC	-2.9
C1-Nd	DIPC	-2.6
C1-Nda	DIPC	-2.7
C1-P1	DIPC	-1.8
C1-P2	DIPC	-1.6
C1-P3	DIPC	0.3
C1-P4	DIPC	1.4
C1-P5	DIPC	2.4
C2-C2	DIPC	-6.2
C2-C3	DIPC	-6.4
C2-C4	DIPC	-5.6
C2-C5	DIPC	-5.1
C2-N0	DIPC	-3.9
C2-Na	DIPC	-2.1
C2-Nd	DIPC	-2.1
C2-Nda	DIPC	-2
C2-P1	DIPC	-1.4
C2-P2	DIPC	-0.9
C2-P3	DIPC	0.6
C2-P4	DIPC	1.8
C2-P5	DIPC	2.7
C3-C3	DIPC	-5.8
C3-C4	DIPC	-5.4
C3-C5	DIPC	-4.6
C3-N0	DIPC	-3.2
C3-Na	DIPC	-1.6
C3-Nd	DIPC	-1.7
C3-Nda	DIPC	-1.7
C3-P1	DIPC	-0.9
C3-P2	DIPC	-0.8
C3-P3	DIPC	0.9
C3-P4	DIPC	2.2
C3-P5	DIPC	3.5
C4-C4	DIPC	-5
C4-C5	DIPC	-4.1
C4-N0	DIPC	-3.1
C4-Na	DIPC	-1.4
C4-Nd	DIPC	-1.2
C4-Nda	DIPC	-1.1
C4-P1	DIPC	-0.7
C4-P2	DIPC	-0.3
C4-P3	DIPC	1.3
C4-P4	DIPC	2.6
C4-P5	DIPC	3.4
C5-C5	DIPC	-3.5
C5-N0	DIPC	-2.2
C5-Na	DIPC	-0.1
C5-Nd	DIPC	-0.6
C5-Nda	DIPC	-0.4
C5-P1	DIPC	0.1
C5-P2	DIPC	0.4
C5-P3	DIPC	2.1
C5-P4	DIPC	3.3
C5-P5	DIPC	4.2
N0-N0	DIPC	-0.9
N0-Na	DIPC	0.8
N0-Nd	DIPC	0.8
N0-Nda	DIPC	0.9
N0-P1	DIPC	1.4
N0-P2	DIPC	1.6
N0-P3	DIPC	3.3
N0-P4	DIPC	4.5
N0-P5	DIPC	5.6
Na-Na	DIPC	2.2
Na-Nd	DIPC	2.5
Na-Nda	DIPC	2.3
Na-P1	DIPC	2.9
Na-P2	DIPC	3.1
Na-P3	DIPC	5.2
Na-P4	DIPC	6.2
Na-P5	DIPC	7.5
Nd-Nd	DIPC	2.7
Nd-Nda	DIPC	2.6
Nd-P1	DIPC	3
Nd-P2	DIPC	3.3
Nd-P3	DIPC	5.2
Nd-P4	DIPC	6
Nd-P5	DIPC	7.4
Nda-Nda	DIPC	2.2
Nda-P1	DIPC	3.1
Nda-P2	DIPC	3.3
Nda-P3	DIPC	5.3
Nda-P4	DIPC	6.2
Nda-P5	DIPC	7.5
P1-P1	DIPC	3.5
P1-P2	DIPC	3.7
P1-P3	DIPC	5.9
P1-P4	DIPC	6.6
P1-P5	DIPC	7.8
P2-P2	DIPC	4
P2-P3	DIPC	6
P2-P4	DIPC	7.3
P2-P5	DIPC	8.3
P3-P3	DIPC	7.9
P3-P4	DIPC	8.6
P3-P5	DIPC	10.2
P4-P4	DIPC	10
P4-P5	DIPC	11.6
P5-P5	DIPC	12.3
